# Supplementary figures and images for: Resistance to Obesity in SOD1 Deficient Mice with a High-Fat/High-Sucrose Diet
Source: MDPI journal article supplement (doi:10.3390/antiox11071403), 2022-07-19

**A**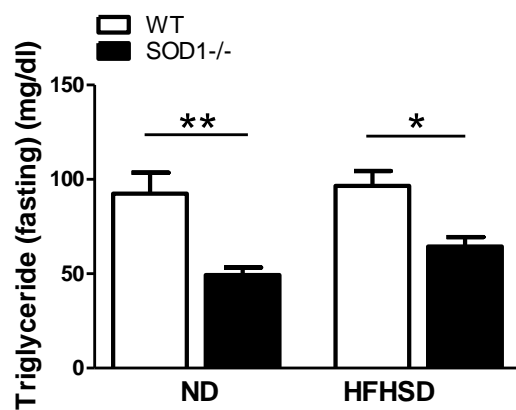**B**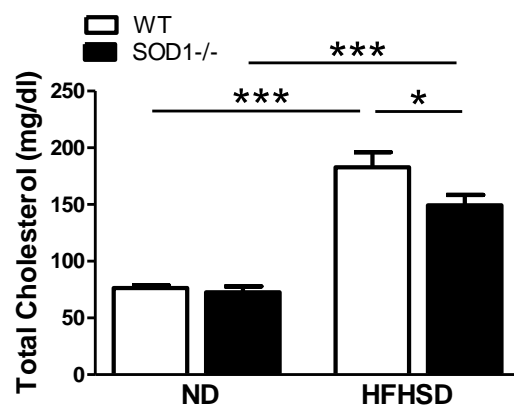

**A**

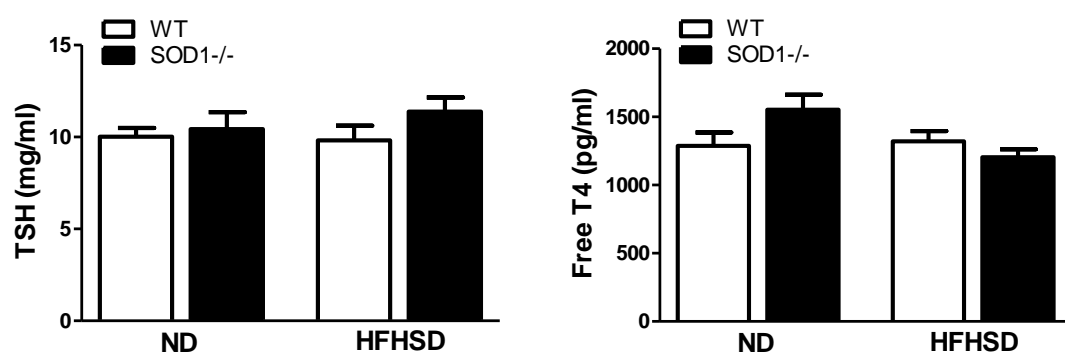

**B**

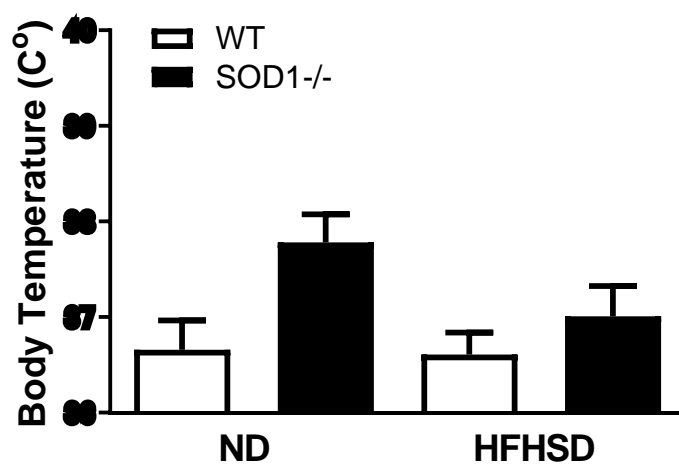

Supplement: s1 [file s1]
